# Supplementary material for: Volcanic aerosol modification of the stratospheric circulation in E3SMv2 – Part 1: Wave–mean flow interaction
Source: Copernicus journal article supplement (doi:10.5194/acp-25-11025-2025), 2025-09-23
Supplement: Supplementary file 1 [file acp-25-11025-2025-supplement.pdf]

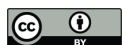

*Supplement of*

## **Volcanic aerosol modification of the stratospheric circulation in E3SMv2 – Part 1: Wave–mean flow interaction**

**Joseph P. Hollowed et al.**

*Correspondence to:* Joseph P. Hollowed ([hollowed@umich.edu](mailto:hollowed@umich.edu))

The copyright of individual parts of the supplement might differ from the article licence.

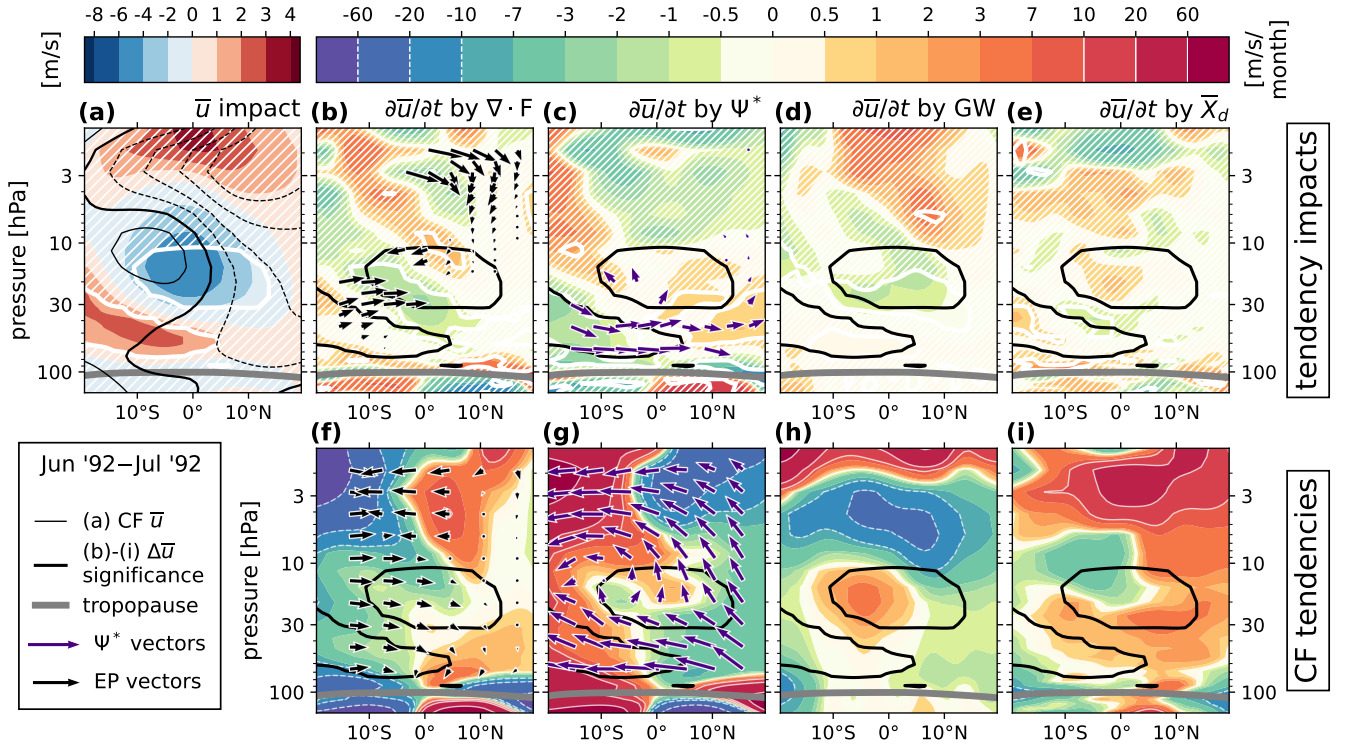

**Figure S1.** The complete TEM budget in the northern hemisphere meridional plane from 500 hPa to 0.5 hPa, averaged from June 1 1992 to July 1 1992. **(a)** the ensemble-mean  $\Delta\bar{u}$  as filled contours (red/blue color scale), with the CF ensemble-mean  $\bar{u}$  overplotted as black contours, drawn every  $10 \text{ m s}^{-1}$ , with negative contours dashed and the zero-line in bold. For every other vertical pair of panels, the top and bottom panels show the ensemble-mean impact and CF ensemble-mean of a variable as filled contours (rainbow colorscale). Panels **(b)** and **(f)** show the EPFD forcing (Eq. (13)). Black vectors drawn in these panels show the significant ensemble-mean impact and the CF ensemble-mean EP flux vectors (Eq. (14, 15)), respectively, scaled according to Jucker (2021). In panel **(b)**, the vector lengths are scaled in length to two orders of magnitude smaller than the CF vectors in panel **(f)**. **(c)** and **(g)** show the residual-circulation forcing (Eq. (7) + Eq. (8)). Purple vectors drawn in these panels show the significant ensemble-mean impact and the CF ensemble-mean  $\Psi^*$  tangent vectors (Eq. (11)), respectively, scaled according to Appendix C. For both  $\Psi^*$  and the EP flux, vectors near and below the tropopause are removed. **(d)** and **(h)** show the gravity-wave forcing. **(e)** and **(i)** show the forcing by diffusion (Eq. (18)). On all panels, regions of 95% statistical significance are enclosed with a bold white contour for the variable plotted on the colorscale, and regions of insignificance are filled with white hatching. For spatial reference, the significance contour of the net impact  $\Delta\bar{u}$  (bold white contour in panel **(a)**) is reproduced as a solid black contour in all other panels. Also plotted on all panels is the tropopause, as a bold grey curve. In the rainbow colorscale used for the tendencies, thin solid (dashed) white contours are drawn between all values larger than positive (negative)  $10 \text{ m s}^{-1}\text{month}^{-1}$  in magnitude.

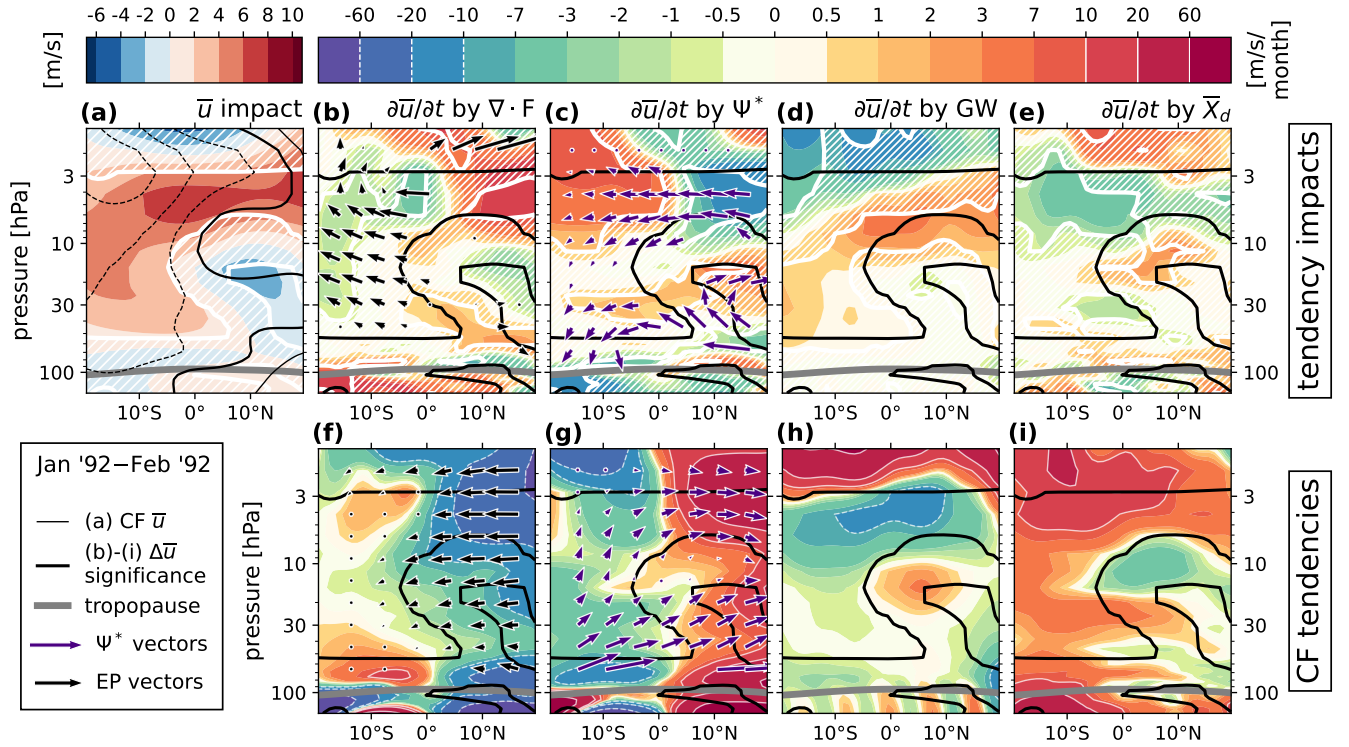

**Figure S2.** The complete TEM budget in the equatorial meridional plane from 500 hPa to 0.5 hPa, averaged from January 1 1992 to February 1 1992. See the caption of Fig. S1 for full panel descriptions.

## References

Jucker, M.: Scaling of Eliassen-Palm flux vectors, *Atmospheric Science Letters*, 22, e1020, <https://doi.org/10.1002/asl.1020>, 2021.
